# Supplementary material for: The proximal first exon architecture of the murine ghrelin gene is highly similar to its human orthologue
Source: PubMed Central journal article supplement (PMC2689246; doi:10.1186/1756-0500-2-85), 2009-05-09
Supplement: 1756-0500-2-85-S1.pdf [file 1756-0500-2-85-S1.pdf]

**Additional File 1: Compilation of exons and exon-intron boundaries of the mouse ghrelin gene**

| <b>Exon</b> | <b>Size (bp)</b> | <b>Comment</b>                             | <b>Intron size (bp)</b> | <b>Experimental evidence or external reference</b> |
|-------------|------------------|--------------------------------------------|-------------------------|----------------------------------------------------|
| 0a          | 19               | First exon                                 | 409 bp to exon 1        | 5' RACE [1], RPA [1], RT-PCR [2]                   |
| 0b          | 48               | First exon                                 |                         | 5' RACE                                            |
| 0c          | 42               | First exon                                 |                         | CAGE (T06R06CF33DC)                                |
| 0d          | 243              | First exon                                 |                         | CAGE (T06R06CF32CB)                                |
| 0e          | 516              | First exon                                 |                         | CAGE (T06R06CF3202)                                |
| 1a          | 133              |                                            | 93 bp to exon 2         | [1]                                                |
| 1b          | 366              | First exon (233 bp 5' extension of exon 1) |                         | 5' RACE                                            |
| 1c          | 240              | First exon (107 bp 5' extension of exon 1) |                         |                                                    |
| 1d          | 238              | First exon (105 bp 5' extension of exon 1) |                         |                                                    |
| 1e          | 194              | First exon (61 bp 5' extension of exon 1)  |                         |                                                    |
| 2           | 117              |                                            | 1942 bp to exon 3       | [1]                                                |
| 3           | 109              |                                            | 783 bp to exon 4        |                                                    |
| 4           | 143              | Terminal exon                              |                         |                                                    |

**References**

1. Tanaka M, Hayashida Y, Iguchi T, Nakao N, Nakai N, Nakashima K: **Organization of the mouse ghrelin gene and promoter: occurrence of a short noncoding first exon.** *Endocrinology* 2001, **142**(8):3697-3700.
2. Wei W, Wang G, Qi X, Englander EW, Greeley GH, Jr.: **Characterization and regulation of the rat and human ghrelin promoters.** *Endocrinology* 2005, **146**(3):1611-1625.
