# Supplementary material for: The proximal first exon architecture of the murine ghrelin gene is highly similar to its human orthologue
Source: PubMed Central journal article supplement (PMC2689246; doi:10.1186/1756-0500-2-85), 2009-05-09
Supplement: 1756-0500-2-85-S2.pdf [file 1756-0500-2-85-S2.pdf]

| <b>Exon</b> | <b>5' UTR length</b> | <b>uORFs</b>        | <b><math>\Delta G</math></b> | <b>Comment</b>                                                      |
|-------------|----------------------|---------------------|------------------------------|---------------------------------------------------------------------|
| 0b          | 76                   | 0                   | -14.6                        | Splicing into exon<br>1 of <i>Ghrl</i><br>demonstrated by<br>RT-PCR |
| 0a          | 47                   | 0                   | -4.27                        |                                                                     |
| 1b          | 261                  | 3<br>(4, 15, 22 AA) | -69.9                        |                                                                     |
| 1c          | 135                  | 1 (4AA)             | -33.3                        |                                                                     |
| 1d          | 133                  | 1 (4 AA)            | -29.0                        |                                                                     |
| 1e          | 89                   | 1 (4 AA)            | -15.7                        |                                                                     |
